# Supplementary material for: Stepwise assembly of an adamantoid Ru4Ag6 cage by control of metal coordination geometry at specific sites
Source: Royal Society of Chemistry journal article supplement (doi:10.1039/c4cc05421k), 2014-01-01
Supplement: c4cc05421k1.pdf [file c4cc05421k1.pdf]

**Stepwise assembly of an adamantanoid Ru<sub>4</sub>Ag<sub>6</sub> cage by control of metal coordination geometry at specific sites.**

Alexander J. Metherell and Michael D. Ward

*Supporting Information*

|                                                                    |       |
|--------------------------------------------------------------------|-------|
| Preparations of complexes                                          | S2    |
| Crystallographic data                                              | S3    |
| Bond lengths from crystal structures                               | S4    |
| Figs. S1 and S2 (additional illustrations of crystal structure)    | S5–S6 |
| Figs S3 – S7 (additional <sup>1</sup> H NMR / COSY / DOSY spectra) | S6–S9 |

## Preparations of complexes

**Preparation of *fac*-[Ru(L<sup>Ph</sup>)<sub>3</sub>][PF<sub>6</sub>]<sub>2</sub>.** A mixture of *fac*-[Ru(PyPzH)<sub>3</sub>](PF<sub>6</sub>)<sub>2</sub> (0.05 g, 0.05 mmol; preparation in ref. 12a) and intermediate **A** (0.11 g, 0.33 mmol; preparation in ref. S1), Cs<sub>2</sub>CO<sub>3</sub> (0.15 g, 0.46 mmol), Bu<sub>4</sub>NI (0.10 g, 0.27 mmol) and CH<sub>2</sub>Cl<sub>2</sub> (20 cm<sup>3</sup>) was heated to reflux in the dark with stirring for 48 h. After cooling to room temperature, excess Cs<sub>2</sub>CO<sub>3</sub> was filtered off and the solvent removed by rotary evaporation, before purification of the yellow solid by column chromatography on silica by elution with MeCN–water–saturated aqueous KNO<sub>3</sub> (100:10:5 ratio by volume). After removing acetonitrile by rotary evaporation, excess saturated aqueous KPF<sub>6</sub> was added and the product was extracted from the suspension into dichloromethane. The organic layer was separated, dried over MgSO<sub>4</sub>, and the solvent removed *in vacuo* to yield *fac*-[Ru(L<sup>Ph</sup>)<sub>3</sub>][PF<sub>6</sub>]<sub>2</sub> as a yellow solid in 68% yield. Slow diffusion of di-isopropyl ether vapour into a solution of the complex in acetone afforded the product as yellow needles.

<sup>1</sup>H NMR (400 MHz, CD<sub>3</sub>CN): δ 8.58 (1H, ddd, *J* = 4.7, 1.8, 0.8; pendant pyridyl H<sup>6</sup>), 8.00 (1H, td, *J* = 8.0, 1.0; pendant pyridyl H<sup>3</sup>), 7.83 (1H, d, *J* = 2.2; pendant pyrazolyl), 7.79 (1H, td, *J* = 7.8, 1.8; pendant pyridyl H<sup>4</sup>), 7.71 (1H, d, *J* = 2.9; coordinated pyrazolyl), 7.61 (1H, td, *J* = 7.8, 1.4; coordinated pyridyl H<sup>4</sup>), 7.27 (1H, ddd, *J* = 7.4, 4.9, 1.1; pendant pyridyl H<sup>5</sup>), 7.24 (1H, d, *J* = 8.0; coordinated pyridyl H<sup>3</sup>), 7.03 (1H, ddd, *J* = 7.9, 5.7, 1.4; coordinated pyridyl H<sup>5</sup>), 6.98 (1H, d, *J* = 2.2; pendant pyrazolyl), 6.94 (1H, d, *J* = 5.7; coordinated pyridyl H<sup>6</sup>), 6.88 (2H, d, *J* = 8.2; phenyl H<sup>3</sup>), 6.54 (1H, d, *J* = 2.9; coordinated pyrazolyl), 5.91 (2H, d, *J* = 8.2; phenyl H<sup>2</sup>), 5.48 (1H, d, *J* = 17.3; CH<sub>2</sub> closer to Ru), 5.29 (2H, s; CH<sub>2</sub> further from Ru), 4.78 (1H, d, *J* = 17.3; CH<sub>2</sub> closer to Ru). ESMS: *m/z* 1424 (M – PF<sub>6</sub>)<sup>+</sup>, 639 (M – 2PF<sub>6</sub>)<sup>2+</sup>. Found: C, 54.9; H, 3.9; N, 16.0. C<sub>72</sub>H<sub>60</sub>F<sub>12</sub>N<sub>18</sub>P<sub>2</sub>Ru requires C, 55.1; H, 3.9; N, 16.1%. UV/Vis in MeCN [ $\lambda_{\text{max}}$ /nm (10<sup>-3</sup> ε/M<sup>-1</sup> cm<sup>-1</sup>): 399 (12.6), 282 (64.4), 250 (66.3).

**Preparation of [Ru<sub>4</sub>Ag<sub>6</sub>(L<sup>Ph</sup>)<sub>12</sub>](PF<sub>6</sub>)<sub>14</sub>.** To a solution of *fac*-[Ru(L<sup>Ph</sup>)<sub>3</sub>](PF<sub>6</sub>)<sub>2</sub> (0.023 g, 0.015 mmol) in CH<sub>3</sub>CN (1 cm<sup>3</sup>) was added a solution of AgPF<sub>6</sub> (0.007 g, 0.028 mmol, 1.8 eq) in CH<sub>3</sub>CN (1 cm<sup>3</sup>). The solution was mixed vigorously for 16h and then evaporated to dryness. The yellow residue was washed with MeOH and dried *in vacuo*. Slow diffusion of di-isopropyl ether vapour into a solution of the complex in acetonitrile afforded the product as yellow blocks. ESMS: *m/z* 2452 {(Ru<sub>4</sub>Ag<sub>6</sub>(L<sup>Ph</sup>)<sub>12</sub>)(PF<sub>6</sub>)<sub>11</sub>}<sup>3+</sup>; 1803 {(Ru<sub>4</sub>Ag<sub>6</sub>(L<sup>Ph</sup>)<sub>12</sub>)(PF<sub>6</sub>)<sub>10</sub>}<sup>4+</sup>; 1678 {(RuAg(L<sup>Ph</sup>)<sub>3</sub>)(PF<sub>6</sub>)<sub>3</sub>}<sup>+</sup>; 1154 {(Ru<sub>4</sub>Ag<sub>6</sub>(L<sup>Ph</sup>)<sub>12</sub>)(PF<sub>6</sub>)<sub>8</sub>}<sup>6+</sup>; 892 {(RuAg<sub>2</sub>(L<sup>Ph</sup>)<sub>3</sub>)(PF<sub>6</sub>)<sub>2</sub>}<sup>2+</sup>; 546 {(RuAg<sub>2</sub>(L<sup>Ph</sup>)<sub>3</sub>)(PF<sub>6</sub>)<sub>3</sub>}<sup>3+</sup>. The vacuum-dried material gave elemental analyses consistent with absorption of large numbers of H<sub>2</sub>O molecules. Anal. Calcd for [Ru<sub>4</sub>Ag<sub>6</sub>(L<sup>Ph</sup>)<sub>12</sub>](PF<sub>6</sub>)<sub>14</sub>•9H<sub>2</sub>O: C, 43.5; H, 3.3; N, 12.7%. Found: C, 43.8; H, 3.6; N, 12.8%. Yield based on this formulation: ca. 80%.

- S1 S. P. Argent, H. Adams, L. P. Harding, T. Riis-Johannessen, J. C. Jeffery and M. D. Ward, *New J. Chem.*, 2005, **29**, 904.  
S2 (a) <http://spdbv.vital-it.ch>; (b) N. Guex and M. C. Peitsch, *Electrophoresis*, 1997, **18**, 2714

## Crystallographic data

Crystal data for *fac*-[Ru(L<sup>ph</sup>)<sub>3</sub>][PF<sub>6</sub>]<sub>2</sub>•acetone: C<sub>75</sub>H<sub>66</sub>F<sub>12</sub>N<sub>18</sub>OP<sub>2</sub>Ru, *M* = 1626.47 g mol<sup>-1</sup>, orthorhombic, space group *Pbca*, *a* = 23.2400(17), *b* = 13.2721(9), *c* = 47.443(3) Å, *U* = 14633.5(17) Å<sup>3</sup>, *Z* = 8, *T* = 100(2) K, λ(Mo-Kα) = 0.71073 Å. 38114 reflections were collected (2θ<sub>max</sub> = 44°) which after merging afforded 8193 independent reflections with *R*<sub>int</sub> = 0.099. Final *R*1 [*I* > 2σ(*I*)] = 0.133; *wR*2 (all data) = 0.310.

Crystal data for [{Ru(L<sup>ph</sup>)<sub>3</sub>}<sub>4</sub>Ag<sub>6</sub>](PF<sub>6</sub>)<sub>14</sub>: C<sub>288</sub>H<sub>240</sub>Ag<sub>6</sub>F<sub>84</sub>N<sub>72</sub>P<sub>14</sub>Ru<sub>4</sub>, *M* = 7790.59 g mol<sup>-1</sup>, monoclinic, space group *P2*/*n*, *a* = 24.688(3), *b* = 30.324(4), *c* = 25.247(3) Å, *b* = 102.819°, *U* = 18430(4) Å<sup>3</sup>, *Z* = 2, *T* = 100(2) K, λ(Mo-Kα) = 0.71075 Å. 167655 reflections were collected (2θ<sub>max</sub> = 45°) which after merging afforded 24082 independent reflections with *R*<sub>int</sub> = 0.065. Final *R*1 [*I* > 2σ(*I*)] = 0.141; *wR*2 (all data) = 0.429.

In both cases crystals scattered weakly due to the complexity of the molecules and the presence of solvation and disorder of solvents / anions; however the quality of the refinement is in each case sufficient to establish the structures and connectivities. Both structures contain a solvent-accessible void containing diffuse electron density that could not be modelled satisfactorily and was removed from the final refinement using the SQUEEZE function in PLATON: full details are in the CIFs. The datasets were collected at the EPSRC National Crystallography Service at the University of Southampton (ref. S3) and solved / refined using the SHELX software package (ref. S4).

S3 S. J. Coles and P. A. Gale, *Chem. Sci.*, 2012, **3**, 683.

S4 G. M. Sheldrick, *Acta Crystallogr., Sect. A*, 2008, **64**, 112.

**Table S1:** Metal-ligand bond distances (Å) in the structure of *fac*-[Ru(L<sup>ph</sup>)<sub>3</sub>][PF<sub>6</sub>]<sub>2</sub>•acetone

|              |           |
|--------------|-----------|
| Ru(1)-N(11B) | 2.062(12) |
| Ru(1)-N(22C) | 2.070(12) |
| Ru(1)-N(11A) | 2.075(11) |
| Ru(1)-N(22A) | 2.092(12) |
| Ru(1)-N(11C) | 2.100(11) |
| Ru(1)-N(22B) | 2.103(12) |

**Table S2:** Metal-ligand bond distances (Å) in the structure of [Ru<sub>4</sub>Ag<sub>6</sub>(L<sup>ph</sup>)<sub>12</sub>](PF<sub>6</sub>)<sub>14</sub>

|                |           |              |          |
|----------------|-----------|--------------|----------|
| Ag(1)-N(52D)   | 2.288(7)  | Ru(1)-N(21B) | 2.053(5) |
| Ag(1)-N(41C)   | 2.328(7)  | Ru(1)-N(22C) | 2.058(7) |
| Ag(1)-N(52C)   | 2.332(6)  | Ru(1)-N(11A) | 2.073(7) |
| Ag(1)-N(41D)   | 2.354(7)  | Ru(1)-N(11C) | 2.087(5) |
| Ag(2)-N(52F)   | 2.288(7)  | Ru(1)-N(11B) | 2.095(6) |
| Ag(2)-N(52F)#1 | 2.288(12) | Ru(1)-N(22A) | 2.096(7) |
| Ag(2)-N(41F)#1 | 2.328(7)  | Ru(2)-N(22D) | 2.051(7) |
| Ag(2)-N(41F)   | 2.328(7)  | Ru(2)-N(22F) | 2.049(6) |
| Ag(3)-N(41B)#1 | 2.317(6)  | Ru(2)-N(22E) | 2.052(7) |
| Ag(3)-N(41B)   | 2.317(6)  | Ru(2)-N(11F) | 2.080(7) |
| Ag(3)-N(52B)   | 2.330(7)  | Ru(2)-N(11D) | 2.094(5) |
| Ag(3)-N(52B)#1 | 2.330(12) | Ru(2)-N(11E) | 2.120(7) |
| Ag(4)-N(41E)   | 2.293(6)  |              |          |
| Ag(4)-N(52A)   | 2.299(7)  |              |          |
| Ag(4)-N(41A)   | 2.308(6)  |              |          |
| Ag(4)-N(52E)   | 2.321(6)  |              |          |

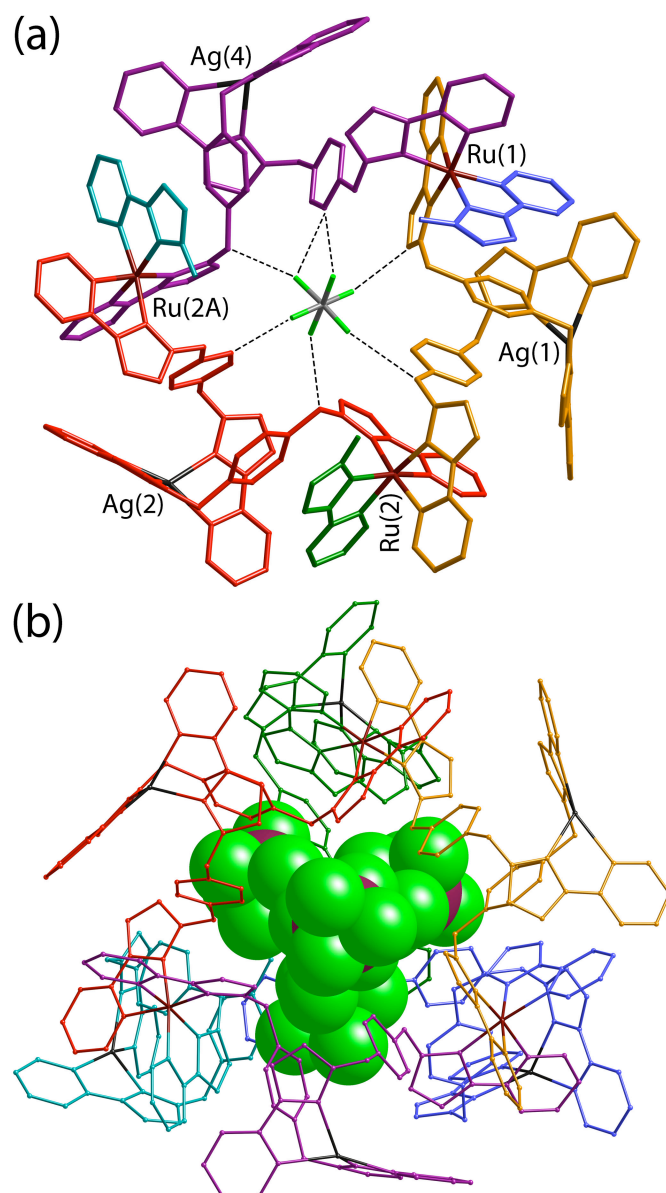

**Figure S1.** Two illustrations of how the encapsulated  $[\text{PF}_6]^-$  anions interact with the cavity of the cage of  $[\{\text{Ru}(\text{L}^{\text{ph}})_3\}_4\text{Ag}_6](\text{PF}_6)_{14}$ . (a) Location of one of the anions in the window in the centre of a  $\text{Ru}_3\text{Ag}_3$  face with some of the shorter  $\text{CH}\cdots\text{F}$  interactions ( $\text{C}\cdots\text{F}$  separation  $\leq 3.15 \text{ \AA}$ ) shown by dotted lines; (b) a view of the cage (in wireframe mode) with the four anions shown in space-filling mode.

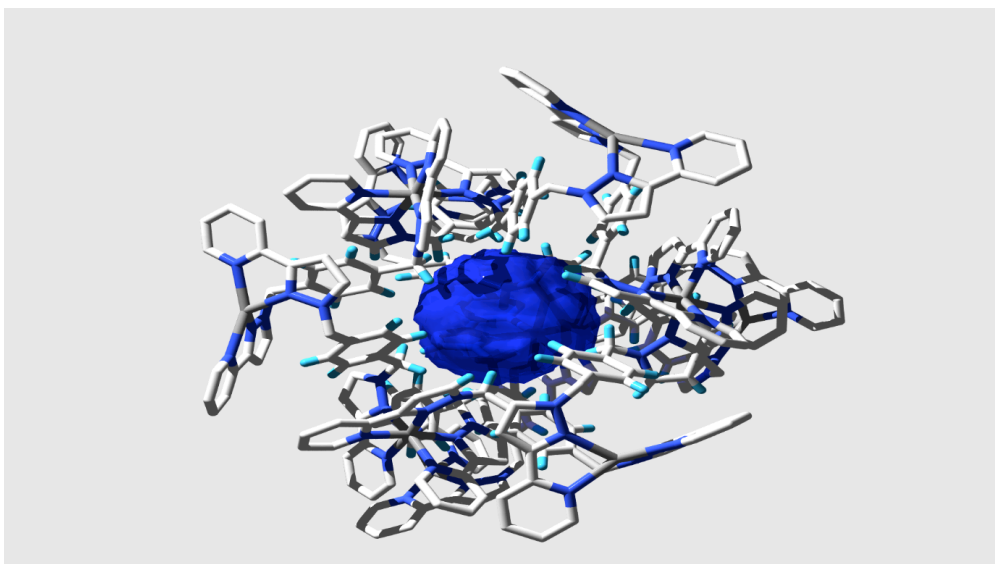

**Figure S2.** A view of the cavity in the centre of  $[\{Ru(L^{ph})_3\}_4Ag_6](PF_6)_{14}$ , shown in blue (generated with Swiss-PDB viewer, ref. S2).

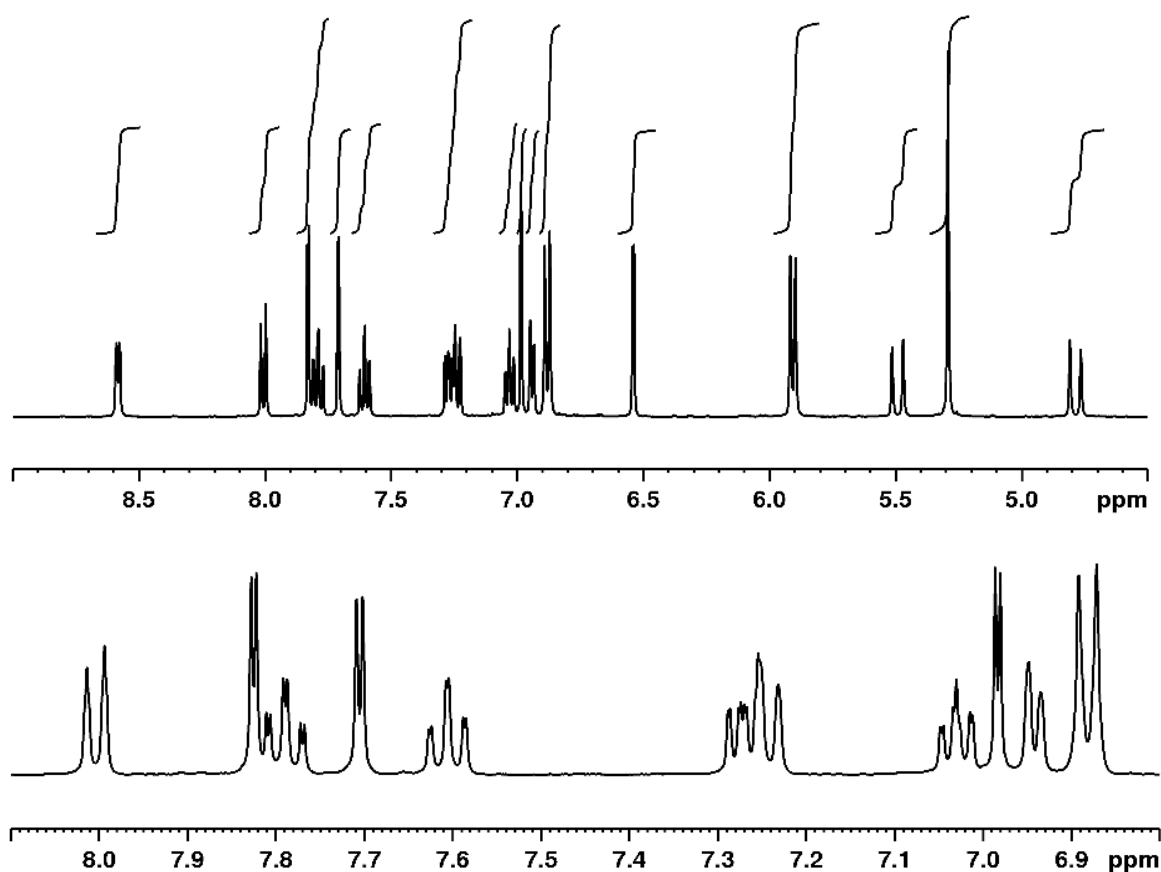

**Figure S3.**  $^1H$  NMR spectrum of *fac*- $[Ru(L^{ph})_3][PF_6]_2$  (MeCN, 400 MHz, RT). Top: complete spectrum. Bottom: expansion of central region. Assignments (given with experimental details) were made on the basis of the COSY spectrum (Fig. S4).

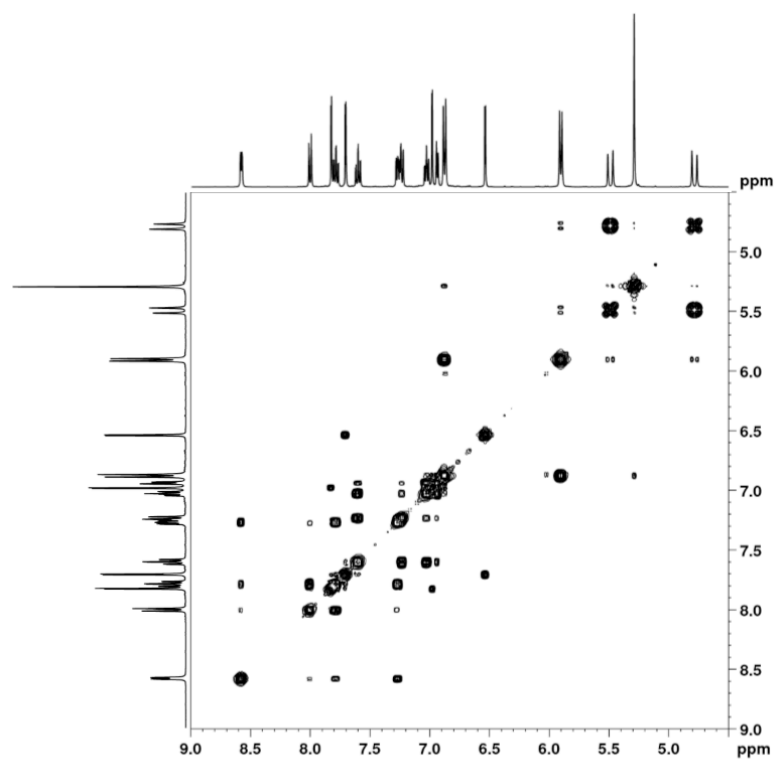

**Figure S4.**  $^1\text{H}$ - $^1\text{H}$  COSY spectrum of *fac*- $[\text{Ru}(\text{L}^{\text{ph}})_3][\text{PF}_6]_2$  (MeCN, 400 MHz, RT).

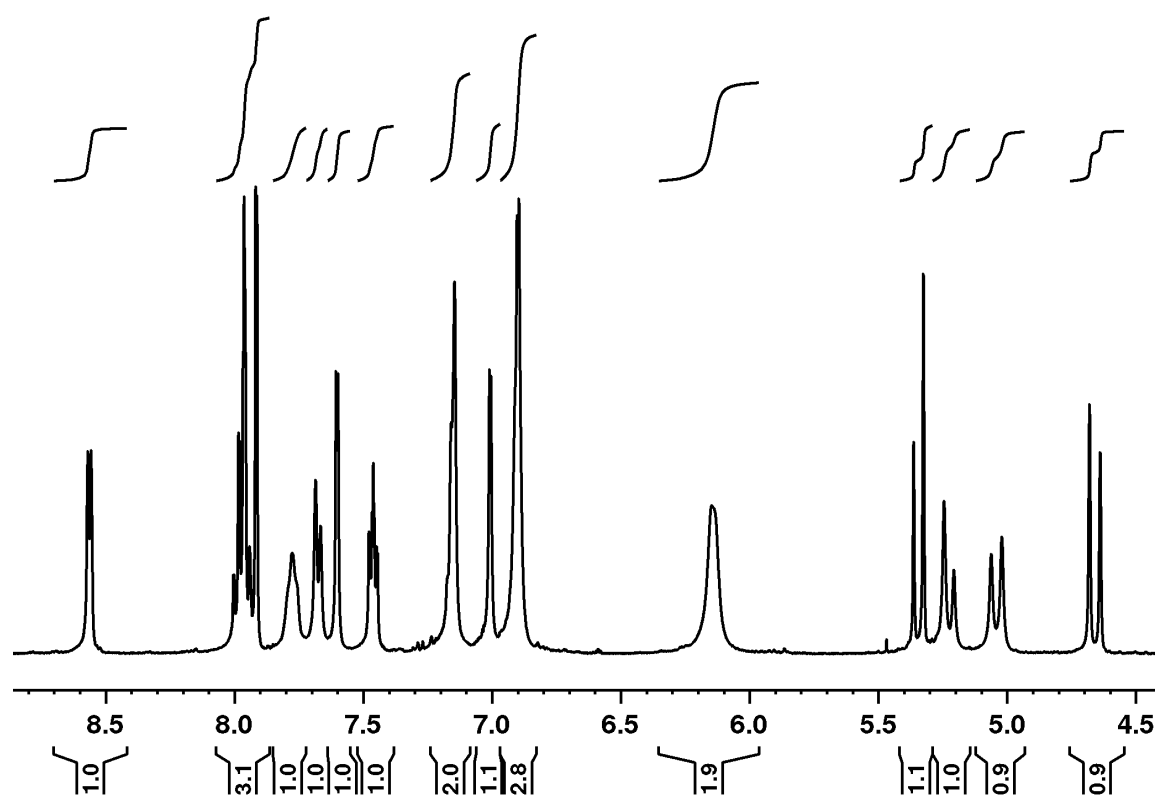

**Figure S5.**  $^1\text{H}$  NMR spectrum of  $[\{\text{Ru}(\text{L}^{\text{ph}})_3\}_4\text{Ag}_6](\text{PF}_6)_{14}$  (MeCN, 400 MHz, 75 °C).

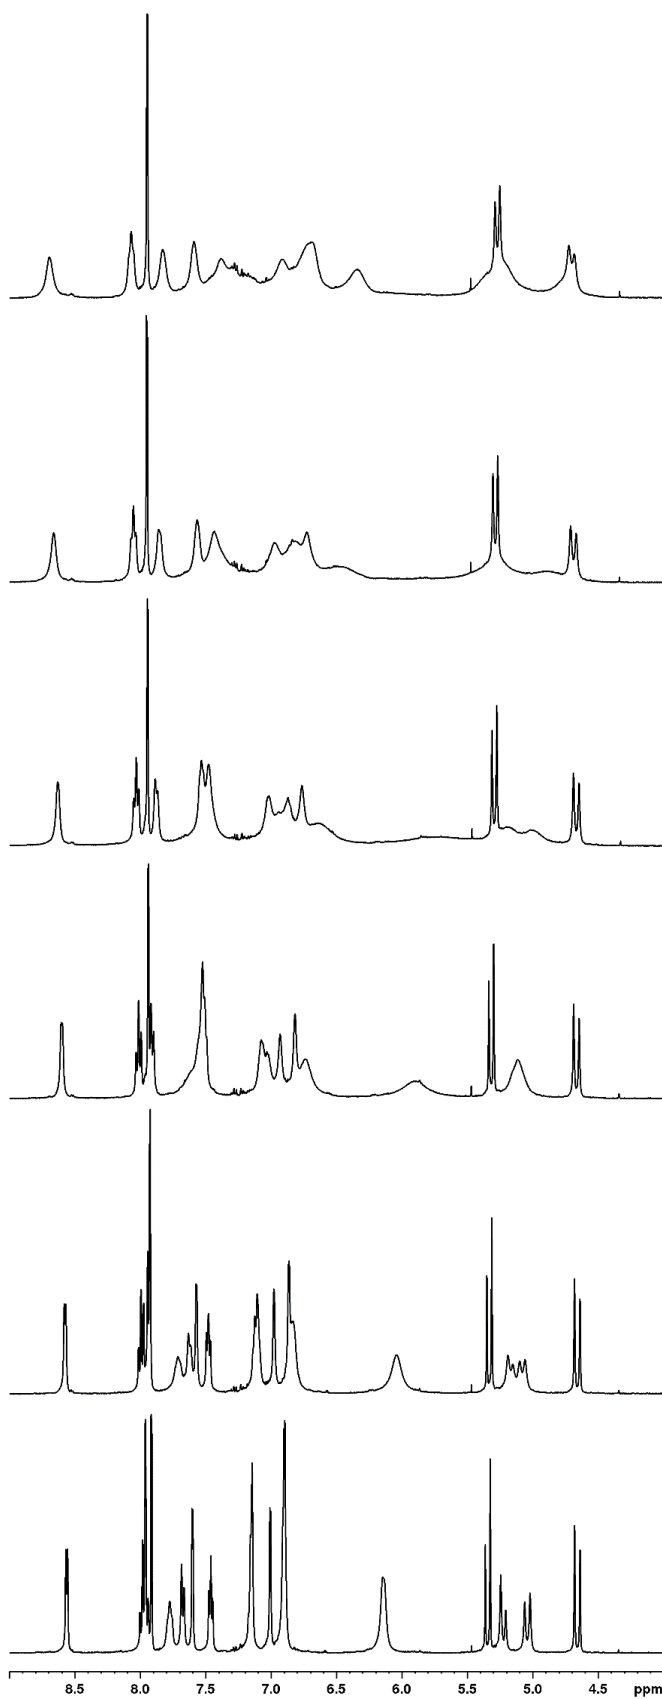

**Figure S6.** Series of  $^1\text{H}$  NMR spectra of  $[\{\text{Ru}(\text{L}^{\text{ph}})_3\}_4\text{Ag}_6](\text{PF}_6)_{14}$  (MeCN, 400 MHz) at (from top down) 25, 35, 45, 55, 65, 75°C showing the sharpening at higher temperatures.

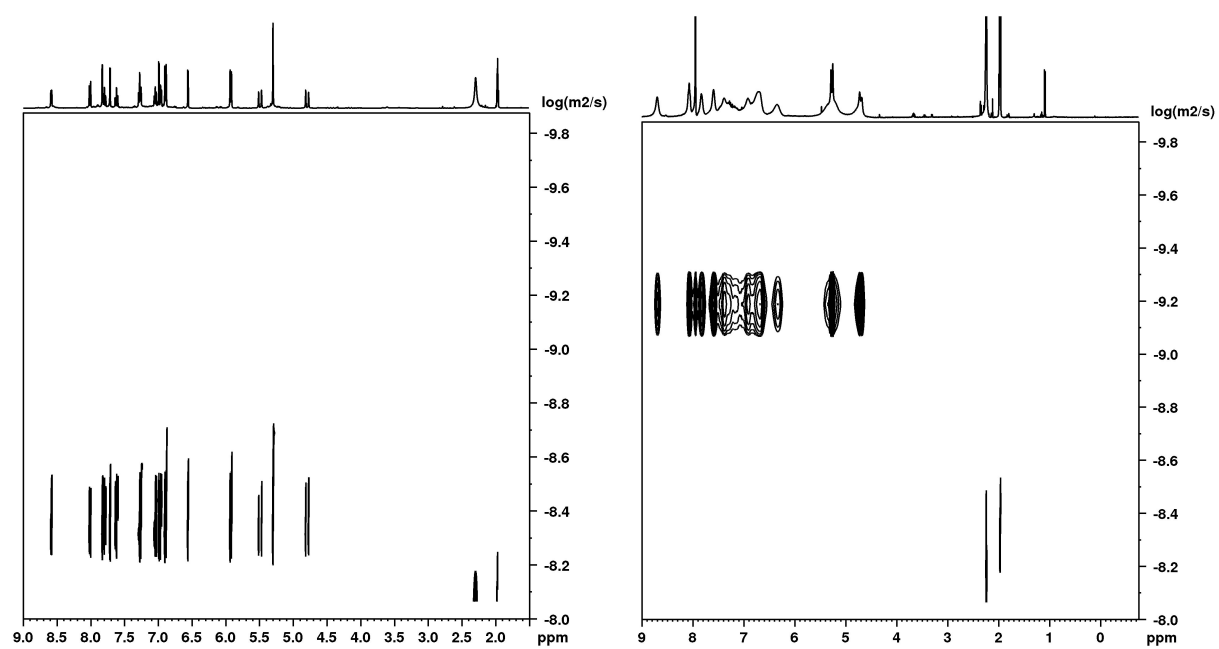

**Figure S7.** DOSY  $^1\text{H}$  NMR spectra (MeCN, 400 MHz, RT) of *fac*- $[\text{Ru}(\text{L}^{\text{ph}})_3][\text{PF}_6]_2$  (left) and  $[\{\text{Ru}(\text{L}^{\text{ph}})_3\}_4\text{Ag}_6](\text{PF}_6)_{14}$  (right)
